# Supplementary material
Source: HighWire-hosted journal article supplement (http://www.cmaj.ca/highwire/filestream/58298/field_highwire_adjunct_files/2/resp-falagas-3-at.pdf)
Supplement: resp-falagas-3-at.pdf [file resp-falagas-3-at.pdf]

**Appendix 3:** Methodological quality and definitions for severe pneumonia and inpatient treatment of the randomized controlled trials included in the meta-analysis of the effectiveness of respiratory fluoroquinolones compared with other antibiotics for the treatment of community-acquired pneumonia (part 1 of 3)

| Study                        | Study design       |    |                           |             |                              | Funding                             | ITT | Criteria for hospital admission                                                                                                                                               | Definition of severe pneumonia                                                                                                                                                      |
|------------------------------|--------------------|----|---------------------------|-------------|------------------------------|-------------------------------------|-----|-------------------------------------------------------------------------------------------------------------------------------------------------------------------------------|-------------------------------------------------------------------------------------------------------------------------------------------------------------------------------------|
|                              | RCT, quality score | DB | Concealment of allocation | Withdrawals | Generation of random numbers |                                     |     |                                                                                                                                                                               |                                                                                                                                                                                     |
| Carbon et al <sup>1</sup>    | MC, 5              | •  | •                         | •           | •                            | Hoechst Marion Russell              | 516 | NA                                                                                                                                                                            | Severe pneumonia was an exclusion criterion                                                                                                                                         |
| D'Ignazio et al <sup>2</sup> | MC, 4              | •  | •                         | •           |                              | Pfizer                              | 423 | Outpatients                                                                                                                                                                   | Severe pneumonia was an exclusion criterion                                                                                                                                         |
| Erard et al <sup>3</sup>     | MC, 2              |    |                           | •           |                              | Aventis                             | 129 | NA                                                                                                                                                                            | PSI score class III-V (intensive care unit) patients excluded)                                                                                                                      |
| File et al <sup>4</sup>      | MC, 2              |    |                           | •           |                              | RW Johnson Pharmaceutical Institute | 590 | NA                                                                                                                                                                            | At least one of: bacteremia, DBP < 60 mmHg, RR ≥ 30 /min                                                                                                                            |
| Finch et al <sup>5</sup>     | MC, 1              |    |                           |             |                              | None                                | 622 | Initial requirement for IV therapy                                                                                                                                            | At least one of: RR ≥ 30 breaths/min, pO <sub>2</sub> < 60 mmHg, need for MV, DBP ≤ 60 mm Hg, chest x-ray with bilateral or multilobar involvement, need for vasopressors for > 4 h |
| Fogarty et al <sup>6</sup>   | MC, 3              |    |                           | •           | •                            | Ortho-McNeil                        | 269 | • 3 criteria of ATS for inpatient treatment, need of MV or > 2 of the following: temperature > 39 or < 35.5 C, RR>30/min, SBP < 90 mm Hg, HR > 130/min, altered mental status | Need for MV, need for vasopressors                                                                                                                                                  |
| Fogarty et al <sup>7</sup>   | MC, 4              | •  | •                         | •           |                              | Bayer                               | 473 | Outpatients                                                                                                                                                                   | Severe pneumonia was an exclusion criterion                                                                                                                                         |
| Frank et al <sup>8</sup>     | MC, 3              |    |                           | •           | •                            | Ortho-McNeil                        | 211 | Initial requirement of IV treatment, PSI score of > 70                                                                                                                        | PSI score class IV-V                                                                                                                                                                |

Continued

**Appendix 3:** Methodological quality and definitions for severe pneumonia and inpatient treatment of the randomized controlled trials included in the meta-analysis of the effectiveness of respiratory fluoroquinolones compared with other antibiotics for the treatment of community-acquired pneumonia (part 2 of 3)

| Study                             | Study design       |    |                           |             |                              | Funding                      | ITT | Criteria for hospital admission                                                                                                                                                                | Definition of severe pneumonia              |
|-----------------------------------|--------------------|----|---------------------------|-------------|------------------------------|------------------------------|-----|------------------------------------------------------------------------------------------------------------------------------------------------------------------------------------------------|---------------------------------------------|
|                                   | RCT, quality score | DB | Concealment of allocation | Withdrawals | Generation of random numbers |                              |     |                                                                                                                                                                                                |                                             |
| Geijo Martinez et al <sup>9</sup> | SC, 1              |    |                           |             |                              | None                         | 49  | age > 60-65 yr, comorbidity, lack of responsiveness >72 h for ambulatory patients, infiltrates > 1 lobe, cavitation or pleural effusion, possible aspiration or incorrect outpatient treatment | Severe pneumonia was an exclusion criterion |
| Gotfried et al <sup>10</sup>      | MC, 4              | •  | •                         | •           |                              | Abbott                       | 299 | Outpatients                                                                                                                                                                                    | Severe pneumonia was an exclusion criterion |
| Hoeffken et al <sup>11</sup>      | MC, 4              | •  | •                         | •           |                              | Bayer                        | 675 | Outpatients                                                                                                                                                                                    | Severe pneumonia was an exclusion criterion |
| Kalbermatt et al <sup>12</sup>    | SC, 1              |    |                           |             |                              | NA                           | 84  | age>65yrs, infiltrates > 1 lobe, pleural effusion, white blood cell >15000 or < 5000, PaO <sub>2</sub> /FiO <sub>2</sub> < 500 and > 300, comorbidity                                          | Severe pneumonia was an exclusion criterion |
| Katz et al <sup>13</sup>          | MC, 3              |    |                           | •           | •                            | Bayer                        | 335 | Initial requirement for IV therapy                                                                                                                                                             | PSI score class IV-V                        |
| Leophonte et al <sup>14</sup>     | MC, 4              | •  | •                         | •           |                              | None                         | 320 | NA                                                                                                                                                                                             | ATS guidelines 1993*                        |
| Lin et al <sup>15</sup>           | SC, 3              |    |                           | •           | •                            | Daiichi<br>Pharmaceutica<br> | 50  | Initial requirement for IV therapy                                                                                                                                                             | PSI score class III-IV                      |
| Lode et al <sup>16</sup>          | MC, 2              |    |                           | •           |                              | Glaxo                        | 341 | Left to the discretion of each investigator                                                                                                                                                    | PSI score class IV-V                        |

Continued

**Appendix 3:** Methodological quality and definitions for severe pneumonia and inpatient treatment of the randomized controlled trials included in the meta-analysis of the effectiveness of respiratory fluoroquinolones compared with other antibiotics for the treatment of community-acquired pneumonia (part 3 of 3)

| Study                          | Study design       |    |                           |             |                              | Funding                | ITT | Criteria for hospital admission                                                                                                 | Definition of severe pneumonia              |
|--------------------------------|--------------------|----|---------------------------|-------------|------------------------------|------------------------|-----|---------------------------------------------------------------------------------------------------------------------------------|---------------------------------------------|
|                                | RCT, quality score | DB | Concealment of allocation | Withdrawals | Generation of random numbers |                        |     |                                                                                                                                 |                                             |
| Norrby et al <sup>17</sup>     | MC, 3              |    |                           | •           | •                            | Hoechst Marion Russell | 619 | Patients >65 yr or < 65 yr with comorbidity or risk factors potentially complicating the course of community-acquired pneumonia | NA                                          |
| Petitpretz et al <sup>18</sup> | MC, 2              | •  |                           |             |                              | None                   | 408 | Left to the discretion of the investigator                                                                                      | Severe pneumonia was an exclusion criterion |
| Portier et al <sup>19</sup>    | MC, 2              |    |                           | •           |                              | Bayer                  | 346 | Age > 65 yr, comorbidity, recent episode of respiratory infection, hospitalization during previous year                         | Severe pneumonia was an exclusion criterion |
| Torres et al <sup>20</sup>     | MC, 3              | •  |                           | •           |                              | Bayer                  | 477 | Outpatients (95%)                                                                                                               | PSI score class IV-V                        |
| Welte et al <sup>21</sup>      | MC, 1              |    |                           |             |                              | Bayer                  | 397 | Need for initial IV treatment according to ATS 1993* guidelines                                                                 | PSI score class IV-V                        |
| Xu et al <sup>22</sup>         | NA, 1              |    |                           |             |                              | None                   | 40  | Initial requirement for IV therapy                                                                                              | Severe pneumonia was an exclusion criterion |
| Zervos et al <sup>23</sup>     | MC, 2              |    |                           | •           |                              | Pfizer                 | 212 | PSI score ≥ 71 and requirement for initial IV therapy                                                                           | PSI score class IV-V                        |

Note: MC = multicentre, SC = single centre, DB = double-blind, RCT = randomized controlled trial, PSI = pneumonia severity index, DBP = diastolic blood pressure, RR = respiratory rate, MV = mechanical ventilation, ATS = American Thoracic Society.

Comorbidity includes chronic obstructive pulmonary disease, cardiac failure, neurological diseases, diabetes mellitus, renal insufficiency, hepatic insufficiency, immunosuppression, alcoholism, malnutrition.

\*ATS guidelines 1993 (reference 31).

**References:**

1. Carbon C, Ariza H, Rabie WJ, et al. Comparative study of levofloxacin and amoxicillin/clavulanic acid in adults with mild-to-moderate community-acquired pneumonia. *Clin Microbiol Infect* 1999;5:724-32.
2. D'Ignazio J, Camere MA, Lewis DE, et al. Novel, single-dose microsphere formulation of azithromycin versus 7-day levofloxacin therapy for treatment of mild to moderate community-acquired pneumonia in adults. *Antimicrob Agents Chemother* 2005;49:4035-41.

3. Erard V, Lamy O, Bochud PY, et al. Full-course oral levofloxacin for treatment of hospitalized patients with community-acquired pneumonia. *Eur J Clin Microbiol Infect Dis* 2004;23:82-8.
4. File TM Jr, Segreti J, Dunbar L, et al. A multicenter, randomized study comparing the efficacy and safety of intravenous and/or oral levofloxacin versus ceftriaxone and/or cefuroxime axetil in treatment of adults with community-acquired pneumonia. *Antimicrob Agents Chemother* 1997;41:1965-72.
5. Finch R, Schurmann D, Collins O, et al. Randomized controlled trial of sequential intravenous (i.v.) and oral moxifloxacin compared with sequential i.v. and oral co-amoxiclav with or without clarithromycin in patients with community-acquired pneumonia requiring initial parenteral treatment. *Antimicrob Agents Chemother* 2002;46:1746-54.
6. Fogarty C, Siami G, Kohler R, et al. Multicenter, open-label, randomized study to compare the safety and efficacy of levofloxacin versus ceftriaxone sodium and erythromycin followed by clarithromycin and amoxicillin-clavulanate in the treatment of serious community-acquired pneumonia in adults. *Clin Infect Dis* 2004;38(Suppl 1):S16-23.
7. Fogarty C, Grossman C, Williams J, et al. Efficacy and safety of moxifloxacin vs clarithromycin for community-acquired pneumonia. *Infect Med* 1999;16:748-63.
8. Frank E, Liu J, Kinasewitz G, et al. A multicenter, open-label, randomized comparison of levofloxacin and azithromycin plus ceftriaxone in hospitalized adults with moderate to severe community-acquired pneumonia. *Clin Ther* 2002;24:1292-308.
9. Geijo Martinez MP, Diaz de Tuesta Chow-Quan AM, Herranz CR, et al. Levofloxacin versus beta-lactamic therapy in community acquired pneumonia that requires hospitalization. *Med Interna* 2002;19:621-5.
10. Gotfried MH, Dattani D, Riffer E, et al. A controlled, double-blind, multicenter study comparing clarithromycin extended-release tablets and levofloxacin tablets in the treatment of community-acquired pneumonia. *Clin Ther* 2002;24:736-51.
11. Hoeffken G, Meyer HP, Winter J, et al.; Community-acquired Pneumonia Study Group. The efficacy and safety of two oral moxifloxacin regimens compared to oral clarithromycin in the treatment of community-acquired pneumonia. *Respir Med* 2001;95:553-64.
12. Kalbermatter V, Bagilet D, Diab M, et al. Oral levofloxacin versus intravenous ceftriaxone and amoxicillin/clavulanic acid in the treatment of community-acquired pneumonia that requires hospitalization. *Med Clin (Barc)* 2000;115:561-3.
13. Katz E, Larsen LS, Fogarty CM, et al. Safety and efficacy of sequential i.v. to p.o. moxifloxacin versus conventional combination therapies for the treatment of community-acquired pneumonia in patients requiring initial i.v. therapy. *J Emerg Med* 2004;27:395-405.
14. Leophonte P, File T, Feldman C. Gemifloxacin once daily for 7 days compared to amoxicillin/clavulanic acid thrice daily for 10 days for the treatment of community-acquired pneumonia of suspected pneumococcal origin. *Respir Med* 2004;98:708-20.
15. Lin TY, Lin SM, Chen HC, et al. An open label randomized comparison of levofloxacin and amoxicillin/clavulanate plus clarithromycin for the treatment of hospitalized patients with community-acquired pneumonia. *Chang Gung Med J* 2007;30:321-32.
16. Lode H, File TM Jr, Mandell L, et al.; 185 Gemifloxacin Study Group. Oral gemifloxacin versus sequential therapy with intravenous ceftriaxone/oral cefuroxime with or without a macrolide in the treatment of patients hospitalized with community-acquired pneumonia: a randomized, open-label, multicenter study of clinical efficacy and tolerability. *Clin Ther* 2002;24:1915-36.
17. Norrby SR, Petermann W, Willcox PA, et al. A comparative study of levofloxacin and ceftriaxone in the treatment of hospitalized patients with pneumonia. *Scand J Infect Dis* 1998;30:397-404.
18. Petitpretz P, Arvis P, Marel M, et al.; CAP5 Moxifloxacin Study Group. Oral moxifloxacin vs high-dosage amoxicillin in the treatment of mild-to-moderate, community-acquired, suspected pneumococcal pneumonia in adults. *Chest* 2001;119:185-95.
19. Portier H, Brambilla C, Garre M, et al. Moxifloxacin monotherapy compared to amoxicillin-clavulanate plus roxithromycin for nonsevere community-acquired pneumonia in adults with risk factors. *Eur J Clin Microbiol Infect Dis* 2005;24:367-76.

20. Torres A, Muir JF, Corris P, et al. Effectiveness of oral moxifloxacin in standard first-line therapy in community-acquired pneumonia. *Eur Respir J* 2003;21:135-43.
21. Welte T, Petermann W, Schurmann D, et al.; MOXIRAPID Study Group. Treatment with sequential intravenous or oral moxifloxacin was associated with faster clinical improvement than was standard therapy for hospitalized patients with community-acquired pneumonia who received initial parenteral therapy. *Clin Infect Dis* 2005;41:1697-705.
22. Xu S, Xiong S, Xu Y, et al. Efficacy and safety of intravenous moxifloxacin versus cefoperazone with azithromycin in the treatment of community acquired pneumonia. *J Huazhong Univ Sci Technolog Med Sci* 2006;26:421-4.
23. Zervos M, Mandell LA, Vrooman PS, et al. Comparative efficacies and tolerabilities of intravenous azithromycin plus ceftriaxone and intravenous levofloxacin with step-down oral therapy for hospitalized patients with moderate to severe community-acquired pneumonia. *Treat Respir Med* 2004;3:329-36.
